## Color Vision Changes Associated with Cataracts

### **Quantifying Color Vision Changes Associated with Cataracts Using Cone Contrast Thresholds**

Urmi Mehta<sup>1,2</sup>, Anna Diep<sup>3</sup>, Kevin Nguyen<sup>4</sup>, Bryan Le<sup>5</sup>, Clara Yuh<sup>2</sup>, Caroline Frambach<sup>3</sup>, John Doan<sup>6</sup>, Ang Wei<sup>3</sup> MD, Anton M. Palma<sup>7</sup> PhD, MPH, Marjan Farid<sup>1</sup> MD, Sumit Garg<sup>1</sup> MD, Sanjay Kedhar<sup>1</sup> MD, Matthew Wade<sup>1</sup> MD, Kailey A. Marshall<sup>1</sup> OD, Kimberly A. Jameson<sup>8</sup> PhD, M. Cristina Kenney<sup>1</sup> MD, PhD, Andrew W. Browne<sup>1,7,9</sup> MD, PhD

**Word Count:** 4864

**Word Count (Text):** 3,349

**Financial Support:** - RPB unrestricted grant to UCI Department of Ophthalmology  
- ICTS KL2 Grant number is KL2 TR001416

**Conflict of Interest:** No conflicting relationship exists for any author

**Corresponding author:** Urmi Mehta

<sup>1</sup> **Gavin Herbert Eye Institute**, Department of Ophthalmology, University of California, Irvine, Irvine 92617, United States

<sup>2</sup> Western University of Health Sciences, Pomona 91766, United States

<sup>3</sup> University of California, Irvine School of Medicine, Irvine 92617, United States

<sup>4</sup> Creighton University School of Medicine, Omaha 68124, United States

<sup>5</sup> Drexel University College of Medicine, Philadelphia 19129, United States

<sup>6</sup> Medical College of Wisconsin, Wauwatosa 53226, United States

<sup>7</sup> Institute for Clinical and Translational Sciences, University of California, Irvine, Irvine 92617, United States

<sup>8</sup> Institute for Mathematical Behavioral Sciences, University of California, Irvine, Irvine 92617, United States

<sup>9</sup> Department of Biomedical Engineering, University of California, Irvine, Irvine 92617, United States

## Color Vision Changes Associated with Cataracts

### Abstract

**Purpose:** The cone contrast threshold (CCT) test quantified color vision changes in subjects of all ages and those undergoing cataract surgery.

**Methods:** Twenty-four healthy volunteers from two cohort studies performed CCT using best corrected visual acuity, filters, mydriasis, and pinhole correction. Retrospective cross-sectional study of patients seen in eye clinics evaluated the relationship between age and color vision, and age and lens status in 355 eyes. Lastly, 25 subjects performed CCT before and after cataract surgery.

**Results:** CCT scores were most reliable in the non-mydratic condition without pinhole correction. Progressively dense brown filters produced small but significant reductions in S-cone sensitivity. Linear regression analysis of phakic subjects showed a decline for all cone classes with age. Rate of decline was greater for S-cones (slope (95% CI) = -1.09 (-1.23, 0.94)) than M-cones (slope (95% CI) = -0.80 (-0.95, -0.66)) and L-cones (slope (95% CI) = -0.66 (-0.81, -0.52)). CCT scores increased for S-cones but reduced for L- and M-cones in pseudophakic subjects compared to phakic patients. CCT scores after cataract surgery increased for S-cones, M-cones, and L-cones by 33.0 ( $p < 0.001$ ), 24.9 ( $p = 0.001$ ), and 22.0 ( $p = 0.008$ ).

**Conclusions:** CCT assessment allows for clinically practical quantitation of color and contrast vision improvement after cataract surgery and aging patients who note poor vision despite good visual acuity.

**Translational Relevance:** CCT testing, historically used in research, is now a clinically practical tool to evaluate age and cataract related changes in color and contrast vision and routinely quantify vision beyond black and white visual acuity testing.

## Color Vision Changes Associated with Cataracts

### 1 **Introduction**

2 Color vision is an integral part of visual function that gradually decreases with age<sup>1-3</sup>. However,  
3 visual fields and acuity are the only elements routinely measured or considered in clinical trials.  
4 Senescent changes, including senile miosis and increased density and opacity of optical media<sup>2,5</sup>  
5 diminish the amount of light reaching the retina where visual transduction initiates visual acuity,  
6 contrast sensitivity, and color vision<sup>6</sup>. The most common etiology for reduced media clarity is  
7 lenticular opacification. With age, the translucent lens begins to yellow and harden toward  
8 brunescence, increasing its absorption of short-wavelength visible light, causing acquired tritan  
9 deficits<sup>7-9</sup>. Increasing lens density and the eventual progression to cataracts increase forward  
10 light scattering, reducing retinal illumination, contrast sensitivity, and visual acuity while  
11 increasing glare<sup>2</sup>.

12  
13 Most studies of age-related changes in color vision were performed using investigational color  
14 vision assays that are not routinely available in clinics. The anomaloscope, considered the  
15 quantitative “gold standard” for assessing color vision deficiency (CVD), is a matching test that  
16 quantifies abnormalities along the deutan and protan (red-green) axis<sup>14</sup>. Extensive training to  
17 administer, high equipment cost, and long test duration yield anomaloscopy a rarely used tool  
18 outside research settings. Instead, Ishihara and Hardy-Rand-Rittler (HRR) pseudoisochromatic  
19 plates (PIPs), which ask subjects to identify colored numbers or shapes against multi-colored  
20 backgrounds on a number of plates with increasing difficulty for object recognition, are  
21 employed because they are cost effective and easy to administer. Although all PIPs provide  
22 quantitatively discrete data, they provide little information about the severity or extent of CVD<sup>16</sup>.

23

## Color Vision Changes Associated with Cataracts

24 The Farnsworth-Munsell 100-Hue (FM-100) arrangement test is more discriminative than PIPs.  
25 It requires subjects to arrange 85 different colored cards in 4 different groups by order of their  
26 hue<sup>17</sup>. Recent adaptations to this test into software have improved previous setbacks, such as  
27 length of assessment time and wear and tear to physical pigmented cards leading to hue  
28 confusion<sup>18</sup>. However, FM-100 correlates significantly with nonverbal intelligence<sup>19</sup> and  
29 subjectively determines the degree of CVD<sup>14</sup>. Furthermore, performance complexity and long  
30 test duration yield it impractical in routine clinical practice.

31  
32 Computerized programs, like the custom system used by Fristrom and Lundh, which displayed  
33 colored letters on a computer monitor, found a quantifiable negative impact on color sensitivity  
34 in subjects undergoing cataract surgery that was greatest for the tritan axis<sup>2</sup>. These prior studies  
35 using custom computerized testing or traditional color vision tests are either not broadly  
36 available, clinically practical, or provide sufficient and reliable information.

37  
38 The more recent introduction of the cone contrast threshold (CCT) test answered the challenges  
39 posed by traditional color vision tests by allowing for faster and easier testing while producing  
40 accurate quantitation and characterization of CVD<sup>16</sup>. The original cone contrast test by Rabin  
41 (RCCT) presented a randomized series of colored letters visible to a single cone type in five  
42 steps of decreasing contrast to determine an interpolated contrast threshold<sup>16,20</sup>. Using RCCT,  
43 Fujikawa et al found a gradual decline in CCT scores with age in phakic subjects that increased  
44 back to normal values in pseudophakic subjects<sup>10</sup>.

45

## Color Vision Changes Associated with Cataracts

46 CCT testing differentiates itself from prior testing modalities because it rapidly yields continuous  
47 quantitative data for all 3 cone classes. Recent advances in precise computer-based testing and  
48 system affordability have yielded logistically practical and readily available clinical visual  
49 function test devices to quantify and report quantitative changes in color and contrast vision.  
50 This work presents findings from a systematic investigation of media opacity on color vision  
51 using a conventional and clinically practical CCT system, ColorDx<sup>®</sup> CCT HD<sup>®</sup> (Konan Medical,  
52 Irvine CA). CCT HD was a collaborative development under the Cooperative Research and  
53 Development Agreement with the US Air Force, School of Aerospace Medicine, Operational  
54 Based Vision Assessment Team at Wright Patterson Air Force Base to provide increased  
55 reliability and resolution of color vision testing with an expanded low-contrast range not  
56 available with the original RCCT. Precision pilot assessment was the original focus of CCT HD.  
57 However, efficient and highly granular assessment of acquired deficiencies, even in “normal  
58 color vision” ranges, may have useful clinical implications for functional vision testing in disease  
59 and drug/substance toxicity conditions <sup>22</sup>.

60

61 This study sought to quantify the influence of age and cataractous media opacity on color and  
62 contrast vision. Color vision changes were first quantified in healthy subjects with simulated  
63 media opacity and in normal healthy patients from all age groups. A cohort of healthy patients  
64 across a wide age range was studied to evaluate color vision changes with age. Finally, color  
65 vision changes associated with cataract surgery were quantified before and after surgery.

66

67 **Methods**

## Color Vision Changes Associated with Cataracts

68 This study received Institutional Review Board approval from the University of California,  
69 Irvine and was conducted in accordance with the Declaration of Helsinki. Studies performed  
70 were HIPAA-compliant and all participants enrolled in the perioperative CCT testing provided  
71 informed written consent. Three separate analyses were performed to evaluate the effects of  
72 cataracts on color vision.

73

### 74 **Subjects and Protocol**

#### 75 *Optimal CCT test conditions and test validation (neutral density filters)*

76 CCT testing conditions were optimized to determine if mydriasis affected CCT results, and if  
77 pinhole correction could be used to account for mydriasis or presbyopia during CCT testing.  
78 Neutral density filters were evaluated to confirm reduction in CCT scores with increased filter  
79 density. Thirty-six phakic eyes of 18 subjects (10 female, 8 male) between the ages of 23-38  
80 ( $25.3 \pm 3.3$ ) were recruited for this study. Testing was performed in triplicate under the following  
81 conditions: best corrected visual acuity (BCVA, no filter), distance BCVA with mydriasis  
82 (dilated), neutral density filter (ND) 03, ND 09, ND 15 (Bernell Corp), and pinholes. One eye  
83 was temporarily patched while the fellow eye underwent testing. The inclusion criteria were: (1)  
84 age  $\geq 18$  (2) no history of ocular disease or procedures (3) best corrected visual acuity of 20/20 or  
85 better in the study eye.

86

#### 87 *Simulated cataractous media opacity (brown filters)*

88 Cataract-like media opacity were simulated using brown filter lenses with increasing density.  
89 The inclusion criteria were the same as described for CCT testing optimization. Six phakic eyes  
90 of 6 additional healthy subjects (5 female, 1 male) between the ages of 23-29 without any ocular

## Color Vision Changes Associated with Cataracts

91 history were recruited for this study. Right eyes were tested under the following conditions: no  
92 filter, filter 1, filter 2, filter 3, filter 4 (a combination of filter 2 and filter 3 in series), and “blue  
93 blocker” filter (BPI, Empire Optical). The left eye remained patched throughout testing.

94

### 95 ***Filter spectral transmission***

96 The spectral transmission for the different brown filters was obtained using a compact  
97 spectrometer (CCS200/M, THORLABS, Newton, NJ). Indirect sunlight from clear skies was  
98 used to create a baseline spectrum without photobleaching the sensor. The spectra from each  
99 filter were collected while maintaining the same position and angle of the sensor. Relative  
100 transmission of each filter was calculated. The spectral emission of the CCT monitor for red,  
101 green, and blue screens were also measured.

102

### 103 ***Age and lens status associations with color vision***

104 The relationship between age and color vision in phakic and pseudophakic subjects was  
105 retrospectively reviewed in healthy patients attending optometry and medical clinics. Healthy  
106 phakic (256) eyes were identified from the electronic medical record. Inclusion criteria for  
107 phakic subjects included: (1) age between 6-90 (2) no history of cataract extraction or surgery in  
108 study eye (3) no history of ocular disease in study eye other than age related cataract formation.  
109 A second analysis evaluated color vision in older patients. Forty-two phakic and 57  
110 pseudophakic eyes were identified and evaluated with CCT. Inclusion criteria for the second  
111 older age analysis included: (1) age  $\geq 50$  (2) history of age-related cataract surgery in the study  
112 eye (3) no history of ocular disease aside from cataract in study eye. Testing in pseudophakic  
113 subjects was performed well after ( $> 3$  months) the perioperative period from cataract surgery.

## Color Vision Changes Associated with Cataracts

114

### 115 *Effects of cataract on color vision*

116 Finally, the effect of cataract was studied by evaluating CCT performance before and after  
117 cataract surgery. Thirty eyes (11 OD, 19 OS) from 25 patients (12 female, 13 male) between the  
118 ages of 51-84 were recruited for this prospective study. The inclusion criteria were: (1) age >50  
119 (2) no history of retinal/macular pathology affecting central vision (3) completion of post-  
120 operative visit. Subjects were excluded if their visual acuity decreased by >2 lines on Snellen at  
121 their post-op month 1 visit. Visual acuity and color vision were assessed before surgery and 1-2  
122 months after cataract extraction with intraocular lens insertion to minimize the occurrence or  
123 retinal/corneal edema that may have developed in the proximal perioperative period. At their  
124 post-op visit, pseudophakic subjects with a monofocal IOL targeted for distance vision  
125 performed CCT with near add correction, while patients with intraocular lens selection for near  
126 vision, multifocal lens or extended depth of field (EDOF) lenses wore no reading add.  
127 Information regarding IOL type and color was obtained for 30 eyes and is listed in Table 1.

128

### 129 **Functional Testing**

#### 130 *Cone Contrast Threshold*

131 The ColorDx CCT HD (Konan Medical, Irvine, CA) is an adaptive visual function testing device  
132 that selectively stimulates retinal L-cones, M-cones, and S-cones. Using a color-calibrated anti-  
133 glare screen, a series of tumbling Landolt-C optotypes were presented in randomized directions  
134 in either decreasing or increasing steps of cone contrast against an isochromatic photopic (~74  
135 cd/m<sup>2</sup>) background. Subjects were asked to quickly indicate the orientation of the gap in the “C”  
136 stimulus with gated visibility of 5 seconds per stimulus as forced-choice to the subject, whether



## Color Vision Changes Associated with Cataracts

137 discernable or not. The optotype contrast, as LogCS, for each stimulus was recalculated based on  
138 the subject's prior answers using a Bayesian thresholding method, the Psi-Marginal Adaptive  
139 Technique accounting for nuisance parameters like guessing and finger entry errors<sup>20</sup>. The next  
140 stimulus contrast value increased or decreased based upon priors (misses and correct answers)  
141 with increasingly smaller contrast steps to refine the final LogCS threshold minimizing the  
142 Standard Error. The final CCT value was derived by the Psi-marginal calculation. A summary of  
143 the individual responses as LogCS values are reported. The determined threshold also includes a  
144 unitless Rabin performance score for clinician convenience that is consistent with the tested  
145 contrasts of the original RCCT test in three ranges: >90 is normal, 75-90 indicates possible color  
146 vision deficiency (CVD), <75 indicates CVD. CCT was performed with the patients' BCVA  
147 under photopic and monocular conditions at a distance of 2 feet.

148

### 149 **Statistical Analysis**

150 Three separate analyses evaluating the effects of cataracts on color vision were performed. First,  
151 a generalized linear regression model was fit to compare the effect of each filter condition to  
152 unfiltered state for the S-cone, M-cone, and L-cone. Generalized estimating equations (GEE)  
153 were used to account for repeated measures under each condition. For the second analysis, a  
154 linear regression model fit to evaluate CCT scores for all three cone types on age and lens status  
155 was performed. As above, GEE were used to account for repeated measures since each  
156 individual received binocular testing. The third analysis explored the effects of cataract surgery  
157 on color vision using paired t-tests to assess changes in CCT scores before and after cataract  
158 extraction. All analyses were conducted using R version 1.2<sup>23</sup>.

159

160 **Results**

161 *Optimal CCT test conditions and test validation*

162 Greater CCT scores with least test variability was observed for the non-mydratiac state without  
163 pinholes. The greatest standard deviation for all three cones was observed in the mydratiac state  
164 with a significant reduction in M and L-cone sensitivity. Standard deviation for S-cones, M-  
165 cones, and L-cones with mydrasis were 31.6, 24.7, and 28.0 respectively. CCT scores gradually  
166 declined from baseline when a progressively more dense neutral density filter was placed  
167 between the CCT and viewer's eye. S-cone class demonstrated the steepest decline in CCT  
168 scores with neutral density filters, while the declines in CCT scores for L and M-cones were  
169 notably less pronounced. All differences in CCT scores from baseline were statistically  
170 significant, except for the S-cone in the dilated test condition (Fig. 1).

171

172 *Simulated cataractous media opacity (brown filters)*

173 Six phakic eyes of 6 subjects between the ages of 23-29 ( $25.3 \pm 2.4$ ) without any ocular history  
174 performed CCT using brown filters simulating cataractous media opacity. Figure 2a depicts the  
175 testing system for measuring cone contrast sensitivity using different transmission filters. Figure  
176 2b plots the measured emission of the CCT display primaries. The spectral emission ranges for  
177 red, green, and blue display primaries are: 577 nm-724 nm (peak 608 nm), 475 nm - 615 nm  
178 (peak 541 nm), and 418 nm- 556 nm (peak 445 nm), respectively.

179

180 Figure 2c plots the transmission spectrum for each filter. Filter 1 minimally attenuates shorter  
181 wavelengths in the UV-blue spectrum and permits the greatest transmission of light in the visible  
182 spectrum of all filters tested. Filter 2, filter 3, and the blue blocker filter allow intermediate

## Color Vision Changes Associated with Cataracts

183 visible spectrum transmission. Filter 4 strongly attenuates the entire visible spectrum. Blue  
184 blocker transmission surpasses filter 3 transmission at wavelengths greater than 487 nm. All 5  
185 filters permit near maximal transmission in the infrared portion of the spectrum.

186

187 Figure 2d indicates the subjective response of a test subject observing CCT through brown filters  
188 that simulate cataracts with increasing severity. When progressively dense brown filters were  
189 placed in front of the test subject's eye, a decrease in CCT scores was seen for the S-cone class.  
190 Blue blocker produced a nominal reduction in S-cone sensitivity while the L and M-cones were  
191 nominally unaffected with larger measured confidence intervals. However, statistical  
192 significance was achieved only for the difference in S-cone sensitivity between filter 4 and no  
193 filter.

194

### 195 *Age-related decline in color vision*

196 Phakic eyes (n=256) from subjects between the ages of 6-90 were included in this retrospective  
197 study based on having completed CCT performance during their clinical care. Figure 3a  
198 summarizes the effect of age on color vision in phakic eyes. CCT scores decreased for all three  
199 cone classes with increasing age. The rate of decline was greatest for the S-cones: slope (95%  
200 CI) = -1.09 (-1.23, 0.94), and least for the L-cones: slope (95% CI) = -0.66 (-0.81, -0.52).

201

202 Figure 3b compares the effect of age on color vision between 57 pseudophakic and 42 phakic  
203 eyes in subjects 50-94 years old. CCT scores were lower in pseudophakic eyes for the M-cones  
204 and L-cones. The rate of decline was greatest for the M-cone: slope (95% CI) = -1.27 (-1.78, -  
205 0.76), and least for the L- cones: slope (95% CI) = -0.71 (-1.37, -0.06). CCT scores were higher

## Color Vision Changes Associated with Cataracts

206 in pseudophakic eyes for the S-cones. The rate of decline for the S-cones was: slope (95% CI) =  
207 -1.25 (-1.98, -0.51). The differences between pseudophakic and phakic eyes for all cone classes  
208 were not statistically significant.

209

### 210 *Effects of cataract on color vision*

211 Thirty eyes from 25 subjects between the ages of 51-84 ( $68.9 \pm 6.9$ ) were recruited to  
212 prospectively study changes in color vision with cataract surgery. Changes in CCT scores before  
213 and after cataract extraction are presented in figure 4. Mean changes between pre-op and post-op  
214 CCT scores for the S-cone, M-cone, and L-cone were 33.0 (17.8, 48.2), 24.9 (11.7, 28.1), and  
215 22.0 (6.2, 37.8) respectively.

216

### 217 **Discussion:**

218 CCT is a modern quantitative color vision and contrast assay which takes approximately 7  
219 minutes for two monocular assessments and is practical for use in clinical evaluation. Three  
220 separate analyses using CCT were performed to examine the effect of age and lens status on  
221 color and contrast vision in 3 separate scenarios: young people with simulated cataracts,  
222 populations of phakic or pseudophakic eyes seen in the course of clinical care, and subjects  
223 undergoing cataract surgery.

224

225 CCT scores significantly changed depending on testing conditions. Mydriasis produced the  
226 greatest variability in CCT results and pinhole optics reduced CCT values, indicating that CCT  
227 should be performed without mydriasis and without pinhole correction (Fig. 1). CCT scores  
228 decreased in accordance with increasing neutral filter opacity, highlighting the inverse

## Color Vision Changes Associated with Cataracts

229 relationship between cone contrast thresholds and lens opacity. Of note, neutral density filters  
230 (Fig. 1) produced uniform attenuation of wavelengths across the visible spectrum and should  
231 therefore not alter perceived color. However, S-cone CCT scores demonstrated greater reduction  
232 than L and M-cone classes indicating that the perceived color of an LCD display is unexpectedly  
233 changed by neutral density filters. This might be explained by the central 2 degrees of the fovea  
234 having few to no S-cones<sup>24</sup>. This effect was minimally reproduced using the cataract-simulating  
235 brown filters, which absorb shorter wavelengths more than longer wavelengths (Fig. 2) and was  
236 only seen with the densest brown filter. This may result from greater translucency of the darkest  
237 brown filter than the darkest neutral density filters.

238

239 CCT scores for all cone classes declined with increasing age in phakic subjects, as previously  
240 found by Fujikawa et al. S-cone exhibited the greatest rate of decline in sensitivity, highlighting  
241 the effect of lenticular aging attenuating shorter wavelengths. Alternatively, age-related  
242 decreases in color sensitivity could be attributed to increases in intraocular light scattering  
243 independent of wavelength<sup>21,25</sup>, decreased cone sensitivity, misalignment of cones from  
244 photoreceptor loss, loss of nuclei in the outer nuclear layer, or other neurological factors<sup>2,5,15</sup>.

245

246 Prior studies comparing color sensitivity between pseudophakic and phakic eyes found either  
247 diminished cone contrast sensitivity for the S-cones<sup>26</sup> or for all three cone classes<sup>2,27</sup> in  
248 pseudophakic subjects. However, our findings indicate greater S-cone sensitivity in  
249 pseudophakic subjects compared to healthy controls, similar to studies performed by Mantyjarvi  
250 et al<sup>28</sup>. This could be explained by increased filtering and decreased transmission of blue light in  
251 phakic lenses, which could outweigh the effects from photochemical damage induced by greater

## Color Vision Changes Associated with Cataracts

252 transmission of short-wavelength light through a clear IOL<sup>27</sup>. Photochemical retinal damage  
253 would diminish color sensitivity in pseudophakic eyes, as seen for the M- and L-cones in our  
254 study. Subclinical cystoid macular edema, alternatively, could result in retinal tissue breakdown  
255 and loss of visual function<sup>27</sup>. However, none of the patients in our study developed pseudophakic  
256 macular edema.

257

258 In patients who underwent cataract surgery, cataracts were noted to decrease color sensitivity for  
259 all three cone classes to values below normal, with the greatest decrease seen for S-cone class.  
260 After cataract surgery, color vision increased to normal levels with the blue cone showing the  
261 greatest improvement. This finding is similar to previous studies using quantitatively discrete  
262 and continuous assays<sup>1,2</sup>. Although we did not control for lens color, prior studies have shown  
263 no significant difference in color vision under photopic light conditions between blue light-  
264 filtering IOLs and UV light filtering IOLs<sup>29</sup>. Notably, the visible density of yellow-tinted IOLs is  
265 less remarkable than the lightest tinted brown filter studied here. To our knowledge, this is the  
266 first quantitative demonstration of this phenomenon using a standard clinical visual function test  
267 device while simulating cataractous media opacity, population-based evaluation, and  
268 perioperative assessment.

269

270 A limitation in our study is small sample size for studying progressively dense brown filter  
271 lenses. However, test subjects were healthy and reliable test takers. Another limitation is that  
272 specific time periods between filter assays were not explicitly controlled. Subjects were tested on  
273 one filter, and the subsequent filter was used 30 seconds after normal binocular vision in  
274 photopic conditions. This may have a small effect by allowing gradual dark adaptation as filters

## Color Vision Changes Associated with Cataracts

275 became progressively darker. However, subjects were in photopic conditions during the test and  
276 between tests with total testing time being well below 30 minutes, so dark adaptation would  
277 likely be negligible. Another limitation is that the cohort of cataract surgery patients did not  
278 exclude early disease. A history of glaucoma<sup>2,30</sup>, age-related macular degeneration<sup>31</sup>, diabetic  
279 retinopathy<sup>32,33</sup>, or retinal surgeries could contribute to decreased S-cone sensitivity. To further  
280 distinguish the effect of cataract surgery on color vision for specific disease states, additional  
281 investigation could recruit disease specific sub-populations.

282

283 In conclusion, lenticular senescence and cataract formation diminish color sensitivity for all three  
284 cone classes, with the greatest decrease for S-wavelength sensitive cones. Cataract surgery can  
285 recover a significant proportion of color and contrast vision. CCT can be used to quantify the  
286 effect of cataracts and age impose on vision beyond black and white visual acuity testing. Future  
287 investigation may reveal the ways CCT testing might be used to guide recommendations for  
288 surgery or optimizing lighting conditions during activities of daily life and mitigate fall risks in  
289 the elderly<sup>34-36</sup>. The degree which patients subjectively report a more ‘colorful’ and higher  
290 contrast world after cataract surgery can be quantified using CCT testing.

### **Acknowledgments**

The authors would like to thank Konan Medical for an unrestricted donation of ColorDx CCT HD devices.

## References

1. Ao M, Li X, Qiu W, Hou Z, Su J, Wang W. The impact of age-related cataracts on colour perception, postoperative recovery and related spectra derived from test of hue perception. *BMC Ophthalmol.* 2019;19(1):56.
2. Fristrom B, Lundh BL. Colour contrast sensitivity in cataract and pseudophakia. *Acta Ophthalmol Scand.* 2000;78(5):506-511.
3. Paramei GV, Oakley B. Variation of color discrimination across the life span. *J Opt Soc Am A Opt Image Sci Vis.* 2014;31(4):A375-384.
4. Pierscionek BK. Aging changes in the optical elements of the eye. *J Biomed Opt.* 1996;1(2):147-156.
5. Skomrock LK, Richardson VE. Simulating age-related changes in color vision to assess the ability of older adults to take medication. *Consult Pharm.* 2010;25(3):163-170.
6. Gillespie-Gallery H, Konstantakopoulou E, Harlow JA, Barbur JL. Capturing age-related changes in functional contrast sensitivity with decreasing light levels in monocular and binocular vision. *Invest Ophthalmol Vis Sci.* 2013;54(9):6093-6103.
7. Nguyen-Tri D, Overbury O, Faubert J. The role of lenticular senescence in age-related color vision changes. *Invest Ophthalmol Vis Sci.* 2003;44(8):3698-3704.
8. Schneck ME, Haegerstrom-Portnoy G, Lott LA, Brabyn JA. Comparison of panel D-15 tests in a large older population. *Optom Vis Sci.* 2014;91(3):284-290.
9. Suzuki TA, Qiang Y, Sakuragawa S, Tamura H, Okajima K. Age-related changes of reaction time and p300 for low-contrast color stimuli: Effects of yellowing of the aging human lens. *J Physiol Anthropol.* 2006;25(2):179-187.
10. Fujikawa M, Muraki S, Niwa Y, Ohji M. Evaluation of clinical validity of the Rabin cone contrast test in normal phakic or pseudophakic eyes and severely dichromatic eyes. *Acta Ophthalmol.* 2018;96(2):e164-e167.
11. Sample PA, Esterson FD, Weinreb RN, Boynton RM. The aging lens: in vivo assessment of light absorption in 84 human eyes. *Invest Ophthalmol Vis Sci.* 1988;29(8):1306-1311.
12. Artigas JM, Felipe A, Navea A, Fandino A, Artigas C. Spectral transmission of the human crystalline lens in adult and elderly persons: color and total transmission of visible light. *Invest Ophthalmol Vis Sci.* 2012;53(7):4076-4084.
13. Pokorny J, Smith VC, Lutze M. Aging of the human lens. *Appl Opt.* 1987;26(8):1437-1440.
14. Fanlo Zarazaga A, Gutierrez Vasquez J, Pueyo Royo V. Review of the main colour vision clinical assessment tests. *Arch Soc Esp Oftalmol.* 2019;94(1):25-32.
15. Simunovic MP. Acquired color vision deficiency. *Surv Ophthalmol.* 2016;61(2):132-155.
16. Rabin J, Gooch J, Ivan D. Rapid quantification of color vision: the cone contrast test. *Invest Ophthalmol Vis Sci.* 2011;52(2):816-820.
17. Birch J. Use of the Farnsworth-Munsell 100-Hue test in the examination of congenital colour vision defects. *Ophthalmic Physiol Opt.* 1989;9(2):156-162.
18. Ghose S, Parmar T, Dada T, Vanathi M, Sharma S. A new computer-based Farnsworth Munsell 100-hue test for evaluation of color vision. *Int Ophthalmol.* 2014;34(4):747-751.
19. Cranwell MB, Pearce B, Loveridge C, Hurlbert AC. Performance on the Farnsworth-Munsell 100-Hue Test Is Significantly Related to Nonverbal IQ. *Invest Ophthalmol Vis Sci.* 2015;56(5):3171-3178.



## Color Vision Changes Associated with Cataracts

20. Prins N. The psi-marginal adaptive method: How to give nuisance parameters the attention they deserve (no more, no less). *J Vis.* 2013;13(7):3.
21. Michael R, Bron AJ. The ageing lens and cataract: a model of normal and pathological ageing. *Philos Trans R Soc Lond B Biol Sci.* 2011;366(1568):1278-1292.
22. Fraunfelder F, Fraunfelder F, Chambers W. *Clinical Ocular Toxicology*. 1 ed: Saunders Elsevier 2008.
23. R Core Team. R: A language and environment for statistical computing. R Foundation for Statistical Computing, Vienna, Austria. URL <http://www.R-project.org/>. 2019.
24. Curcio CA, Hendrickson AE. Organization and development of the primate photoreceptor mosaic. *Progress in Retinal Research.* 1991;10:89-120.
25. Fiorentini A, Porciatti V, Morrone MC, Burr DC. Visual ageing: unspecific decline of the responses to luminance and colour. *Vision Res.* 1996;36(21):3557-3566.
26. Jay JL, Gautam VB, Allan D. Colour perception in pseudophakia. *Br J Ophthalmol.* 1982;66(10):658-662.
27. Knowles PJ, Tregear SJ, Ripley LG, Casswell AG. Colour vision in diabetic and normal pseudophakes is worse than expected. *Eye (Lond).* 1996;10 ( Pt 1):113-116.
28. Mantyjarvi M, Syrjakoski J, Tuppurainen K, Honkonen V. Colour vision through intraocular lens. *Acta Ophthalmol Scand.* 1997;75(2):166-169.
29. Zhu XF, Zou HD, Yu YF, Sun Q, Zhao NQ. Comparison of blue light-filtering IOLs and UV light-filtering IOLs for cataract surgery: a meta-analysis. *PLoS One.* 2012;7(3):e33013.
30. Niwa Y, Muraki S, Naito F, Minamikawa T, Ohji M. Evaluation of acquired color vision deficiency in glaucoma using the Rabin cone contrast test. *Invest Ophthalmol Vis Sci.* 2014;55(10):6686-6690.
31. Arden GB, Wolf JE. Colour vision testing as an aid to diagnosis and management of age related maculopathy. *The British journal of ophthalmology.* 2004;88(9):1180-1185.
32. Cho NC, Poulsen GL, Ver Hoeve JN, Nork TM. Selective loss of S-cones in diabetic retinopathy. *Arch Ophthalmol.* 2000;118(10):1393-1400.
33. Fristrom B. Peripheral and central colour contrast sensitivity in diabetes. *Acta Ophthalmol Scand.* 1998;76(5):541-545.
34. Ivers RQ, Cumming RG, Mitchell P, Attebo K. Visual impairment and falls in older adults: the Blue Mountains Eye Study. *J Am Geriatr Soc.* 1998;46(1):58-64.
35. McCarty CA, Fu CL, Taylor HR. Predictors of falls in the Melbourne visual impairment project. *Aust N Z J Public Health.* 2002;26(2):116-119.
36. Saftari LN, Kwon O-S. Ageing vision and falls: a review. *Journal of physiological anthropology.* 2018;37(1):11-11.

## Color Vision Changes Associated with Cataracts

### IOL Tint and Type

| IOL Color  | Number |
|------------|--------|
| Clear      | 28     |
| Yellow     | 2      |
| IOL Type   |        |
| Monofocal  | 23     |
| Multifocal | 4      |
| EDOF       | 3      |

**Table 1.** IOL tint and type (n=30). EDOF= extended depth of field.

**Figure 1.** Effect of testing conditions on CCT scores, estimated via linear regression with GEE to account for repeated measurements (n=18). Error bars represent 95% confidence interval (CI) for mean CCT score and asterisks indicate statistically significant differences from baseline at  $p<0.05$ .

**Figure 2. Simulating cataractous media opacity and their influence on CCT results.** (a) Configuration for measuring cone contrast sensitivity from the ColorDx monitor, with (b) spectral emission of RGB light from CCT monitor, (c) spectral transmission of filters, and (d) CCT scores recorded by each subject performing the assay. Error bars represent 95% CI for mean CCT scores and asterisks indicate statistically significant differences from baseline at  $p<0.05$  (n=6).

**Figure 3.** Effect of age on color vision in (a) phakic eyes from 6 years to 90 years old (n=256 eyes) (b) pseudophakic (n=57) eyes vs phakic eyes (n=42) in patients older than 50.

**Figure 4.** Changes in color vision before and after cataract surgery (n=25). Error bars represent 95% CI and asterisks indicate mean changes significant at  $p<0.05$ .

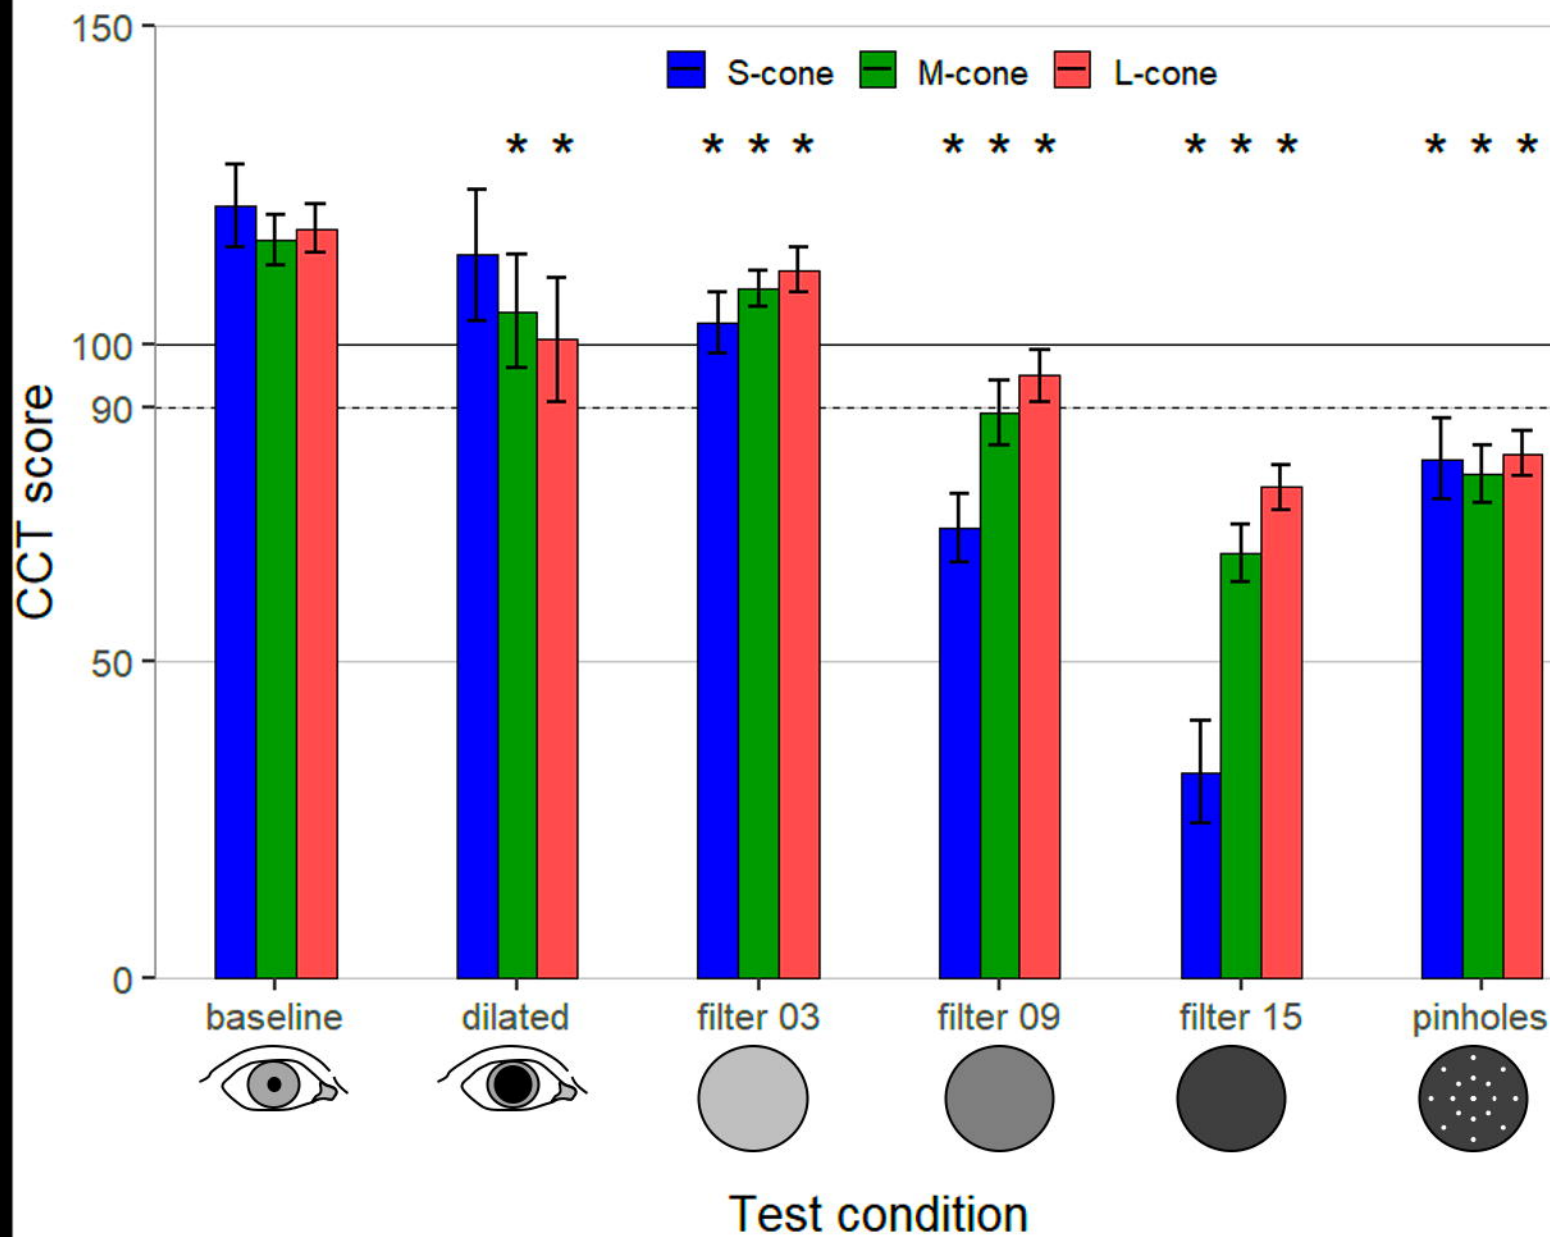

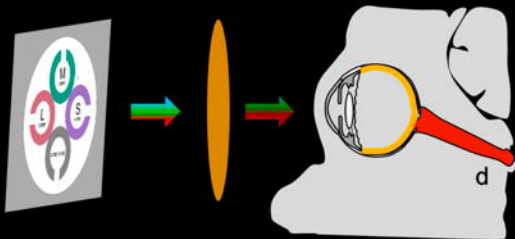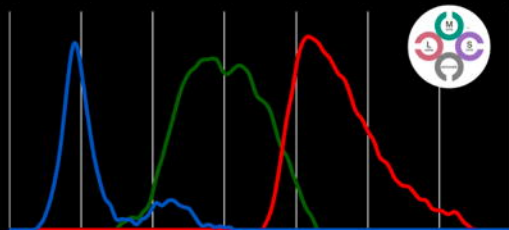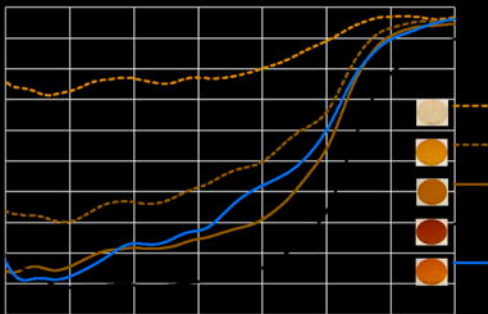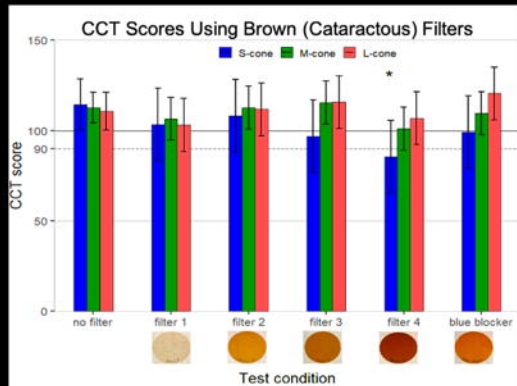

3

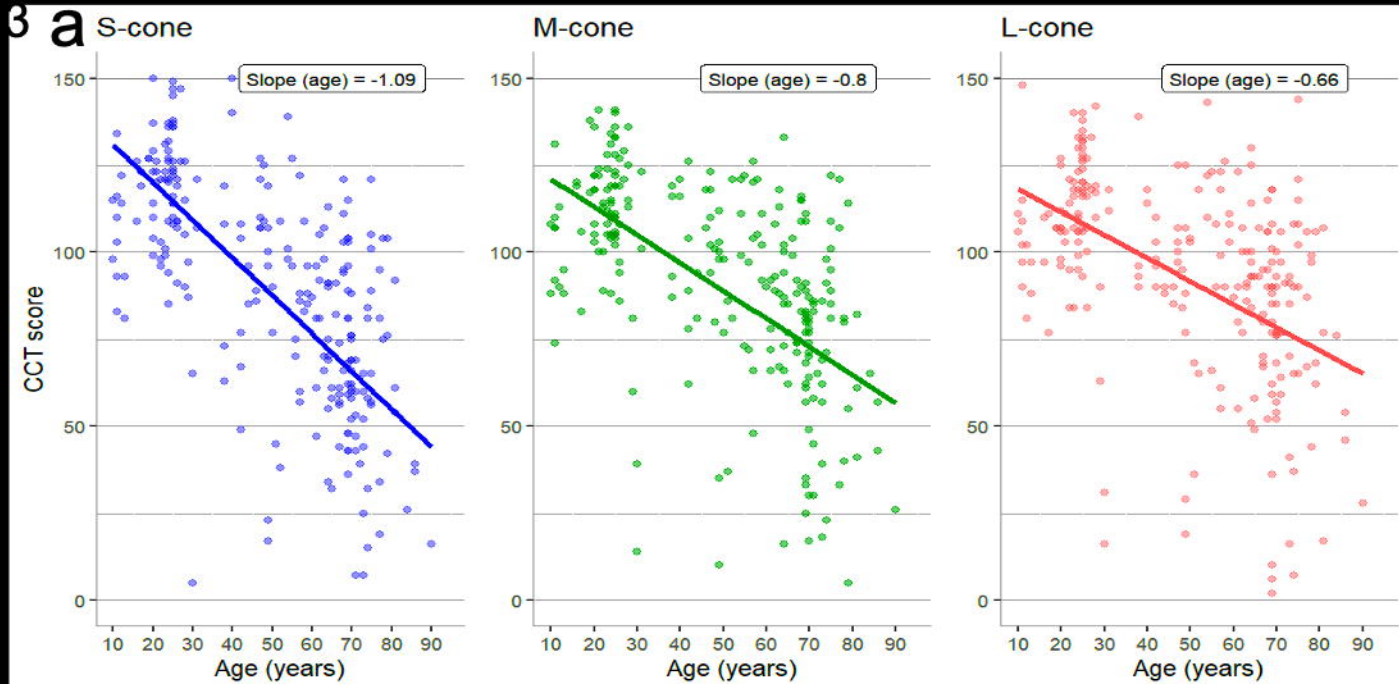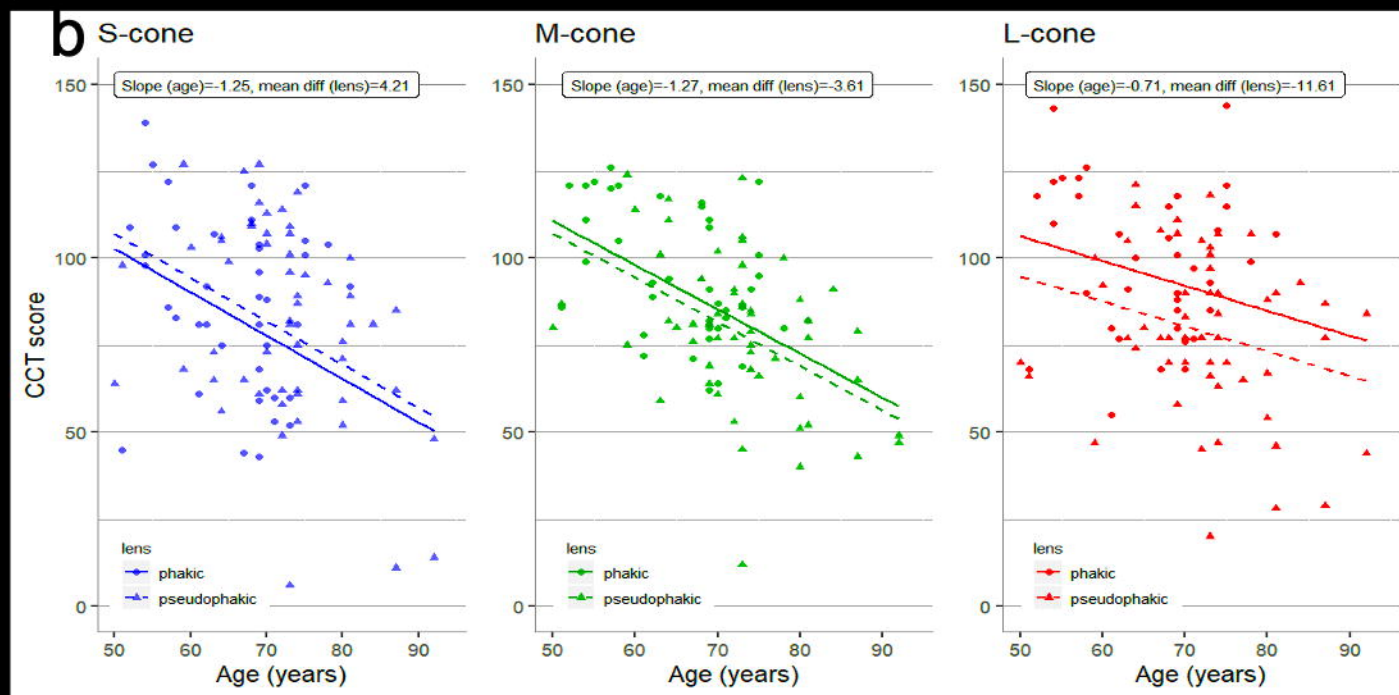

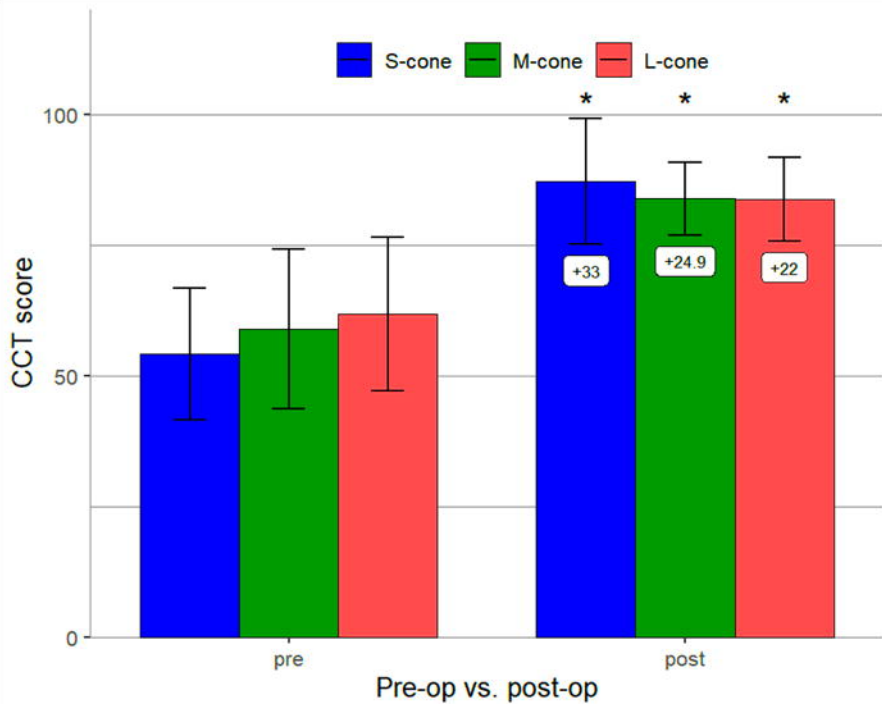

Source: https://www.biorxiv.org/content/biorxiv/early/2020/06/28/2020.06.27.175570.full.pdf
